CORRECTION

# Correction: Does China Pakistan Economic Corridor become an avenue to achieve sustainable development goal no. 2 (food security) in Pakistan: Under the condition of COVID-19?

The *PLOS ONE* Editors

## Notice of republication

This article was republished on February 21, 2023, to address a file issue. The article's Data Availability statement has also been updated. Please download this article again to view the correct version.

## Reference

1. Baig N, Khan S, Bashir I, Ma J (2023) Does China Pakistan Economic Corridor become an avenue to achieve sustainable development goal no. 2 (food security) in Pakistan: Under the condition of COVID-19? *PLoS ONE* 18(1): e0279520. <https://doi.org/10.1371/journal.pone.0279520> PMID: 36608046

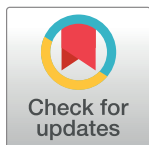

## OPEN ACCESS

**Citation:** The *PLOS ONE* Editors (2023) Correction: Does China Pakistan Economic Corridor become an avenue to achieve sustainable development goal no. 2 (food security) in Pakistan: Under the condition of COVID-19? *PLoS ONE* 18(3): e0282686. <https://doi.org/10.1371/journal.pone.0282686>

**Published:** March 1, 2023

**Copyright:** © 2023 The PLOS ONE Editors. This is an open access article distributed under the terms of the [Creative Commons Attribution License](https://creativecommons.org/licenses/by/4.0/), which permits unrestricted use, distribution, and reproduction in any medium, provided the original author and source are credited.
